# Supplementary material for: The rules of gene expression in plants: Organ identity and gene body methylation are key factors for regulation of gene expression in Arabidopsis thaliana
Source: PubMed Central journal article supplement (PMC2566314; doi:10.1186/1471-2164-9-438), 2008-09-23

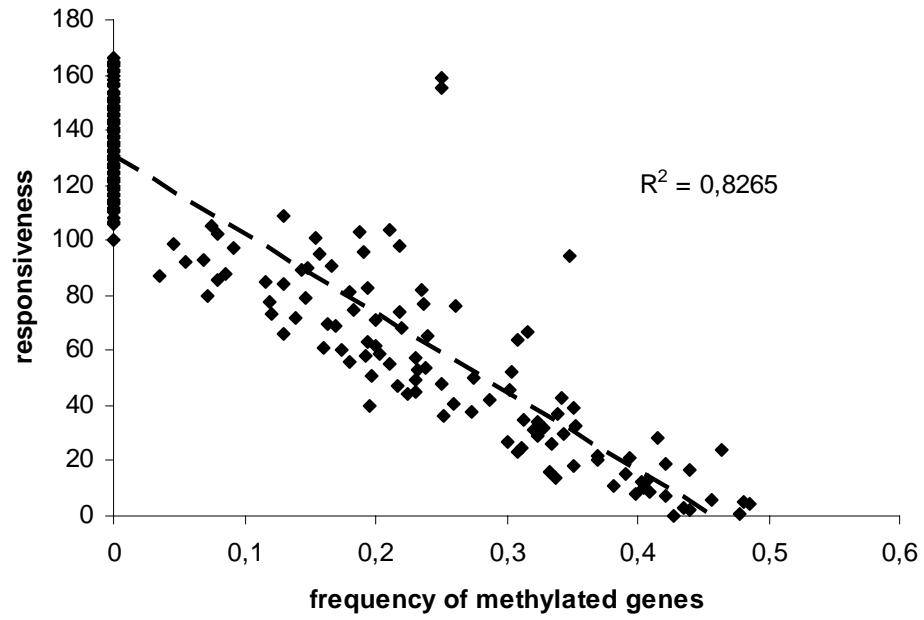

Supplement: 1471-2164-9-438-S18.pdf [file 1471-2164-9-438-S18.pdf]
